# Supplementary material for: Multiple-design and synergism toward superhigh capacitive energy storage with (Bi0.5K0.5)TiO3-based lead-free superparaelectrics
Source: Royal Society of Chemistry journal article supplement (doi:10.1039/d4ta05920d), 2024-01-01
Supplement: d4ta05920d1.pdf [file d4ta05920d1.pdf]

## Supporting Information:

# Multiple-design and synergism toward superhigh capacitive energy storage (Bi<sub>0.5</sub>K<sub>0.5</sub>)TiO<sub>3</sub>-based lead-free superparaelectrics

*Xinyao Li, <sup>a #</sup> Jiachen Xi, <sup>a #</sup> Chongyang Li, <sup>a</sup> Wangfeng Bai, <sup>a\*</sup> Shiting Wu, <sup>a</sup> Peng*

*Zheng, <sup>c</sup> Peng Li, <sup>b</sup> Jiwei Zhai <sup>d\*</sup>*

# These authors contributed equally: *Xinyao Li* and *Jiachen Xi*

<sup>a</sup> College of Materials and Environmental Engineering, Hangzhou Dianzi University, Hangzhou, 310018, China. E-mail: bwfcxj@126.com (Wangfeng Bai)

<sup>b</sup> School of Materials Science and Engineering, Liaocheng University, Liaocheng, 252059, China

<sup>c</sup> College of Electronics and Information, Hangzhou Dianzi University, Hangzhou, 310018, China.

<sup>d</sup> Functional Materials Research Laboratory, School of Materials Science & Engineering, Tongji University, No. 4800 Caoan Highway, Shanghai, 201804, China. E-mail: apzhai@tongji.edu.cn (Jiwei Zhai)

## Experimental section

### Sample preparation:

$(1-x)(\text{K}_{0.5}\text{Bi}_{0.5})\text{TiO}_3-x\text{CaTiO}_3$  (denoted as BKT- $x$ CT,  $x=0, 0.1, 0.3, 0.5$ ) were synthesized via a conventional solid-state method. High-purity  $\text{Bi}_2\text{O}_3$ ,  $\text{K}_2\text{CO}_3$ ,  $\text{TiO}_2$ ,  $\text{CaCO}_3$  ( $\geq 99\%$ ) powders were used as raw powders. The stoichiometrically weighed powders were mixed by ball milling in ethanol for 24 h and then dried at 110 °C for 6h. The obtained BKT and CT powders were calcined at 900 °C for 6 h and 1000°C for 3h in an air atmosphere, respectively. The resulting calcined powders were weighed based on the compositions and then milled again. The dried powders with 8 wt% PVA were pressed into pellets with a diameter of 10 mm. Finally, the ceramic samples were obtained via sintering pellets at 1050-1150 °C for 4h in air. To conduct energy storage measurements, the sample thickness was thinned and polished to  $\sim 50\text{-}70$   $\mu\text{m}$  and then gold electrodes with an area of  $\sim 0.00785$   $\text{cm}^2$  ( $\sim 1$  mm in diameter) were fabricated by ion sputtering.

### Electrical properties:

The dielectric response and impedance spectroscopy of the ceramics with silver electrodes on polished surfaces were examined by a high-precision LCR meter (HP 4990 A; Agilent, Palo Alto, CA). The temperature/frequency/cycles-dependent  $P$ - $E$  loops and FORC curves were measured by a ferroelectric analyzer (RT1-Premier II, Radiant Technologies InC, USA) to evaluate the energy storage capacity. The charging-discharging performance was evaluated by a commercial charge-discharge platform (CFD-003, Gogo Instruments Technology, China). To obtain the Vickers hardness, the ceramic was polished to a thickness of  $\sim 0.1$  cm and then conducted under a load of 4.9033 N for 15 s using a Vickers diamond indenter (FALCON 507, INNO-VATEST, the Netherlands). The absorption spectrum was determined using a UV-vis spectrophotometer (TU-1901, Puxi Instruments Technology, China) with an integrating sphere to achieve the band gap.

### Structural characterization:

The phase structures and local structural information of samples were examined by X-ray diffraction (XRD) using a diffractometer with Cu K $\alpha$  radiation (MiniFlex600, Rigaku, Japan) and Raman spectra using a Raman scattering spectrometer (Horiba/Jobin Yvon, Villeneuve d'Ascq, France). The morphology and elements distribution of the ceramics were recorded by Field-emission scanning electron microscope (FE-SEM, S-4200, Hitachi, Tokyo, Japan), and the grain size of the ceramics was evaluated by a combination of Nano Measurer. The surface morphology, amplitude, and phase signals of well-polished ceramics were characterized by PFM using atomic force microscopy with an ac voltage amplitude of 2.5 V and frequency of 380 kHz (MFP-3D, Asylum Research, USA). The domain morphology was determined by field-emission transmission electron microscope (TEM, FEI Talos F200X, USA) operated at 200 kV. The TEM sample was prepared by a typical process combining mechanical thinning, polishing, and finally ion milling system (Gatan 695, USA).

**The FORC distribution :**

In this work,  $E_{\max}$  is set to be 80 kV/cm,  $\Delta\alpha = \Delta\beta = \Delta E = 3.2$  kV/cm. An approximate method to calculate  $p(\alpha, \beta)$  is

$$p(\alpha, \beta) = \frac{1}{2} \frac{\partial^2 P^2(\alpha, \beta)}{\partial \alpha \partial \beta} \quad \#(1)$$

where  $p(\alpha, \beta)$  is the polarization of the FORC loop,  $\alpha$  is the reversal electric field, and  $\beta$  is the real electric field<sup>1-4</sup>.

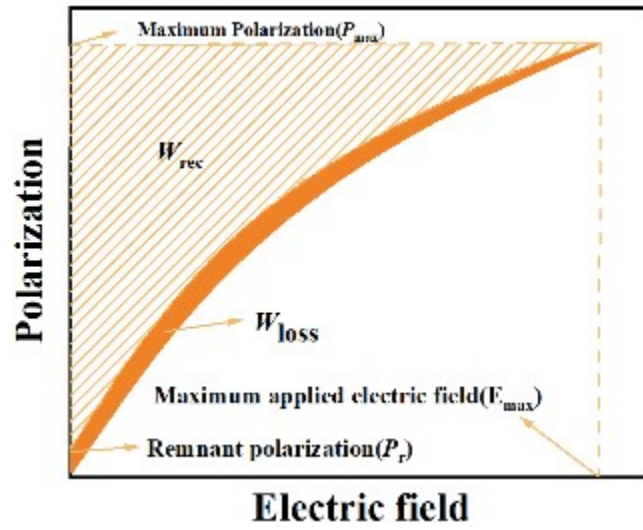

**Figure S1.** Sketch map of  $P$ - $E$  hysteresis loop for the calculation of energy-storage parameters.

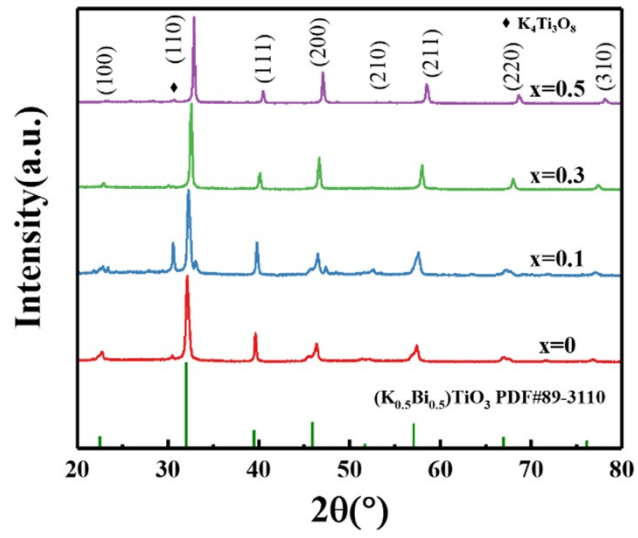

**Figure S2.** XRD patterns of the BKT-xCT ceramics.

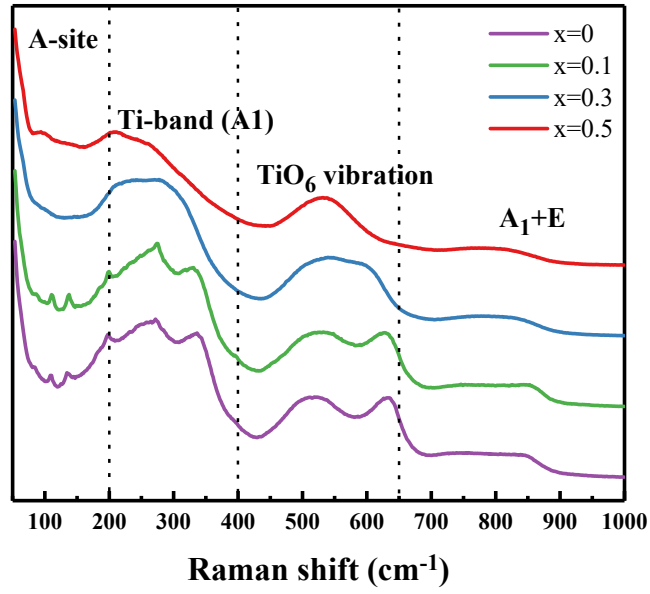

**Figure S3.** Raman spectra of the BKT-xCT ceramics.

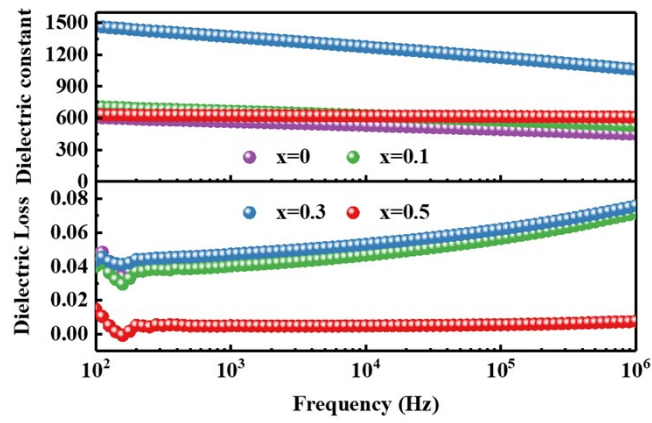

**Figure S4.** Room-temperature dielectric response as a function of frequency for the BKT-xCT ceramics.

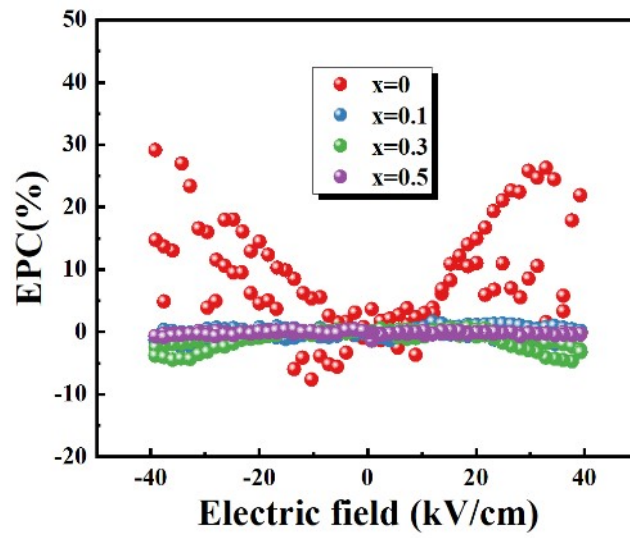

**Figure S5.** The change of dielectric constant for the BKT-xCT ceramics.



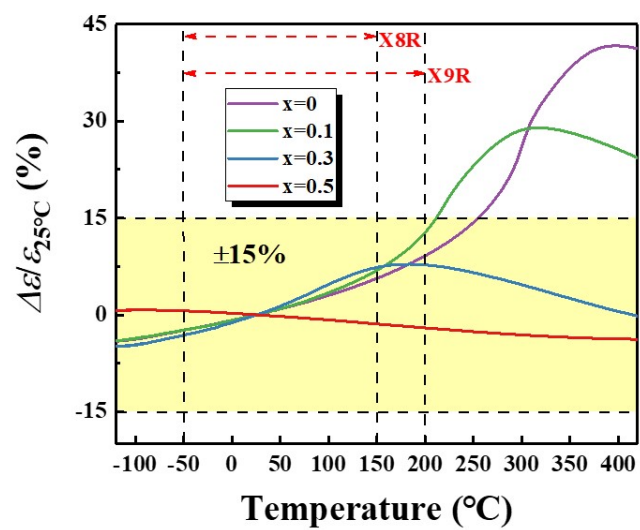

**Figure S6.** The normalized dielectric constant in a wide temperature range for the BKT-xCT ceramics.

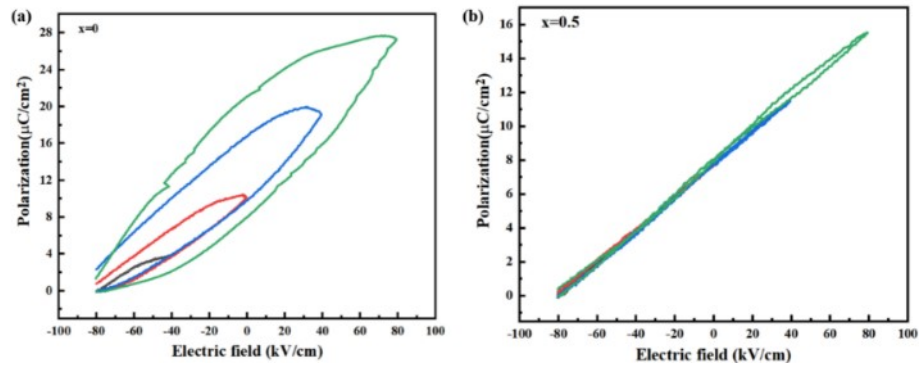

**Figure S7.** FORC curves for (a) BKT and (b) BKT-0.5CT ceramic.

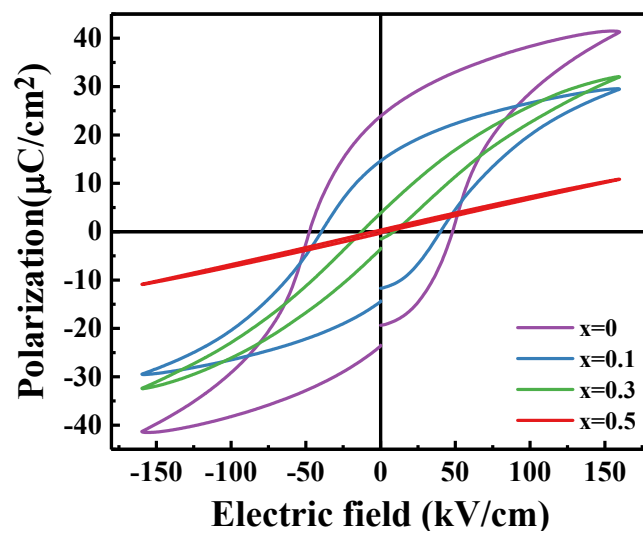

**Figure S8.** Bipolar  $P$ - $E$  loops measured at room temperature and 160  $\text{kV}/\text{cm}$  for BKT-xCT ceramics.

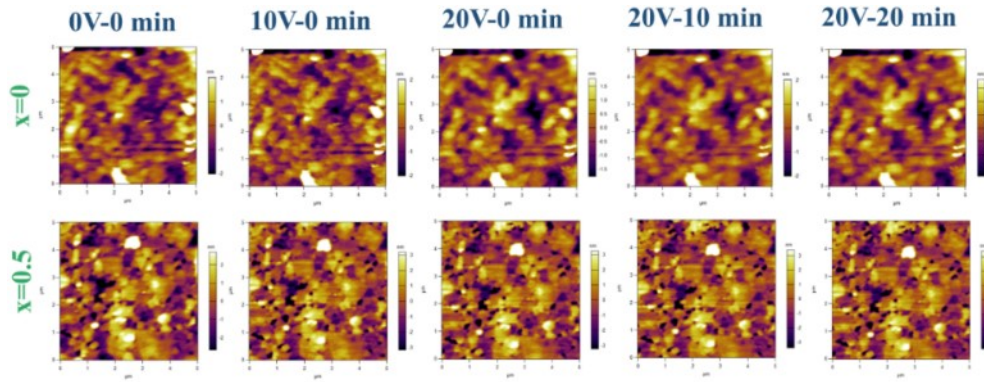

**Figure S9.** Out-of-plane PFM morphology under different voltage and relaxation durations for  $x = 0$  and  $x = 0.5$  ceramic.

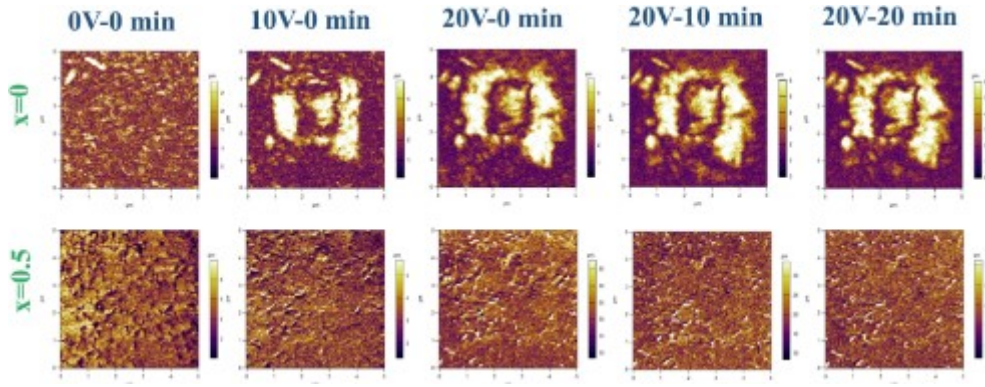

**Figure S10.** Out-of-plane PFM amplitude under different voltage and relaxation durations for  $x = 0$  and  $x = 0.5$  ceramic.

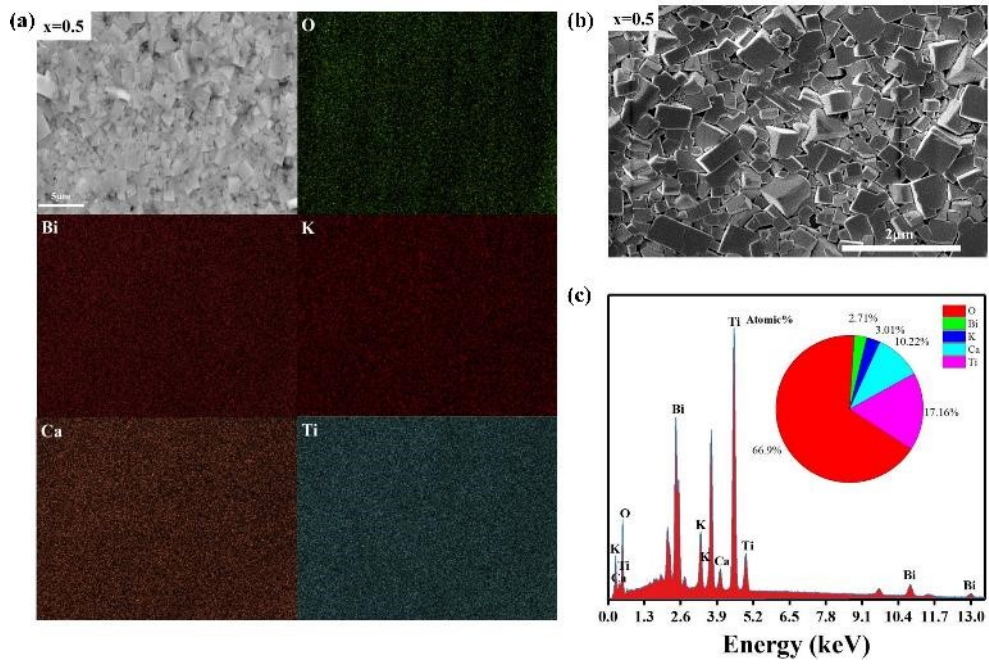

**Figure S11.** (a) Elements mapping, (b) surface SEM image, and (c) energy spectrum and atomic proportion of all elements for  $x=0.5$  ceramic.

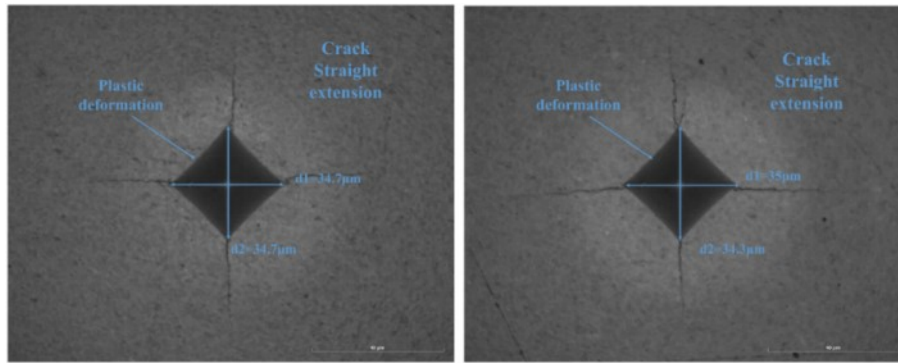

**Figure S12.** Surface patterns generated by Vickers diamond indenter for BKT-0.5CT ceramic.

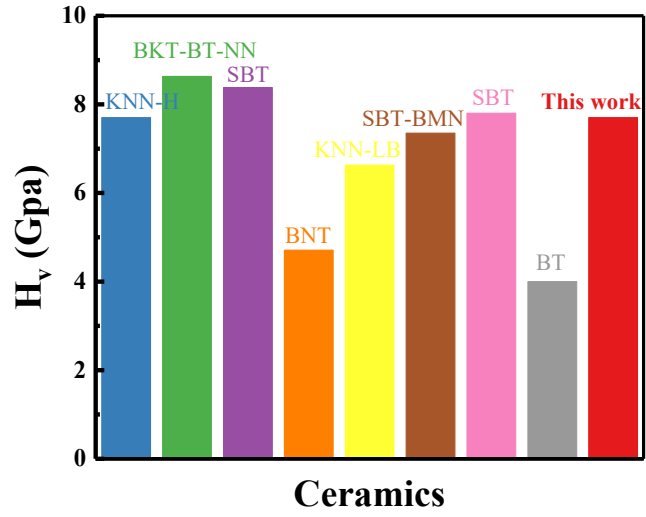

**Figure S13.** A comparison of  $H_v$  between BKT-0.5CT ceramic and some classic perovskite systems.



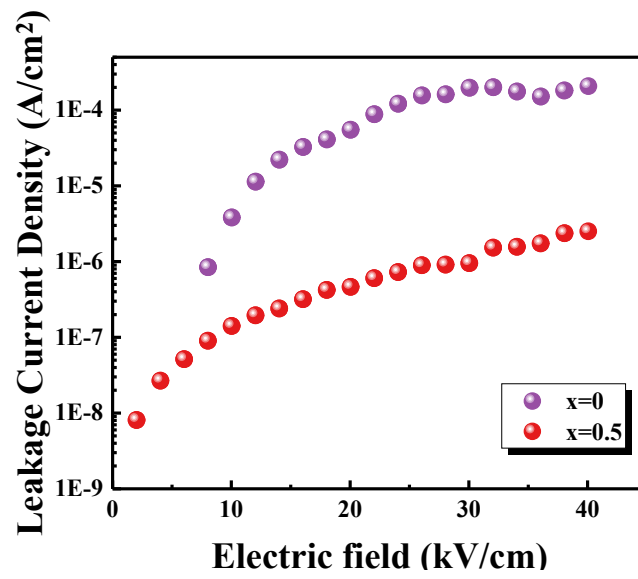

**Figure S14.** Leakage current density measured at 40 kV/cm for BKT and BKT-0.5CT ceramic.

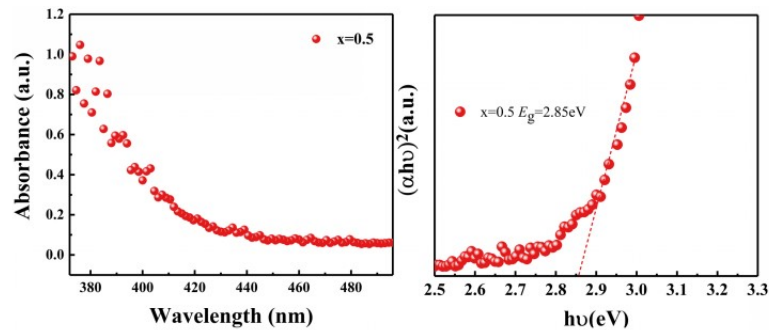

**Figure S15.** UV-vis absorbance spectra and  $(\alpha hv)^2$  vs  $h\nu$  plot for BKT-0.5CT ceramic.

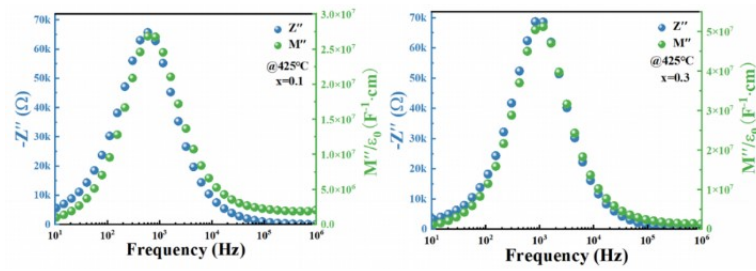

**Figure S16.**  $M''$  spectroscopic plots at 425°C for  $x=0.1$  and  $x=0.3$  ceramic.

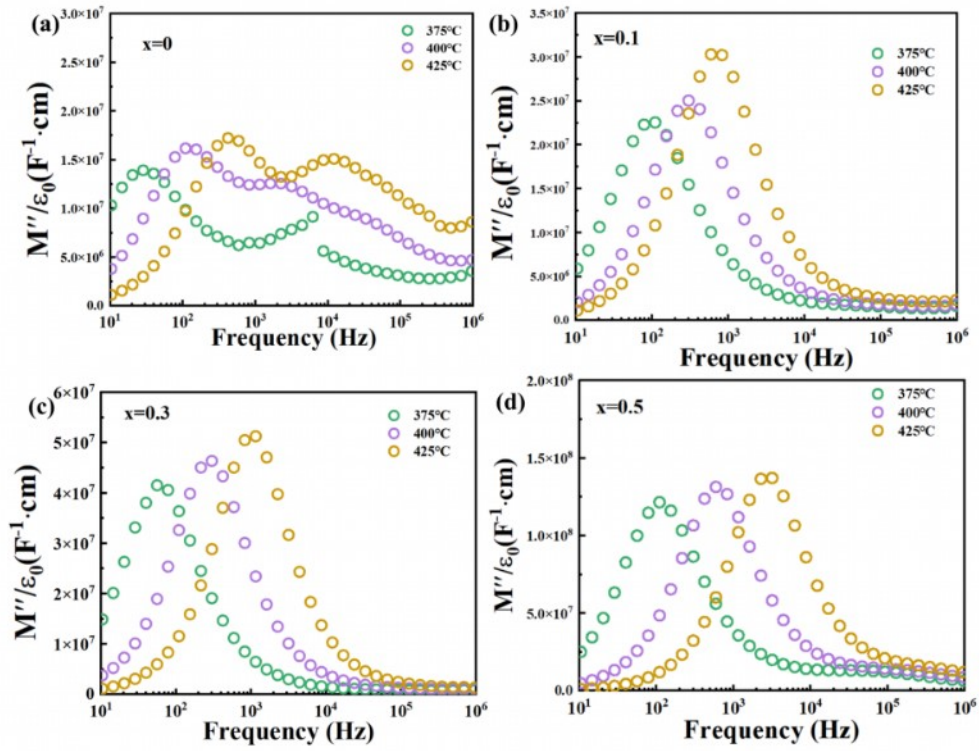

Figure S17.  $M''$  spectroscopic plots at different temperature for BKT-xCT ceramics.

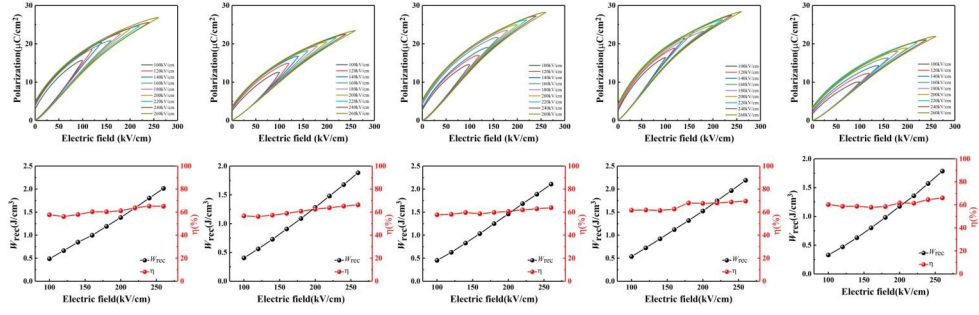

**Figure S18.** Five unipolar field-dependent  $P$ - $E$  loops of pure BKT ceramic.

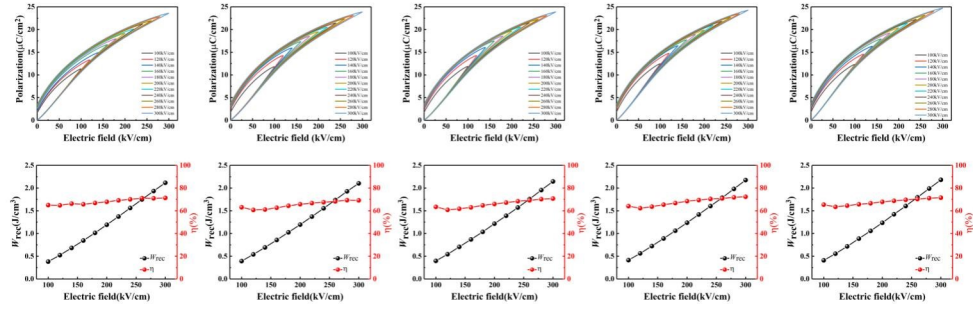

Figure S19. Five unipolar field-dependent  $P$ - $E$  loops of BKT-0.1CT ceramic.

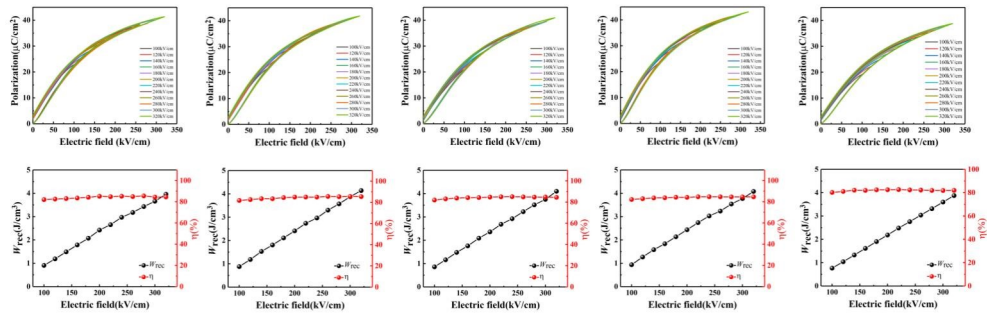

Figure S20. Five unipolar field-dependent  $P$ - $E$  loops of BKT-0.3CT ceramic.

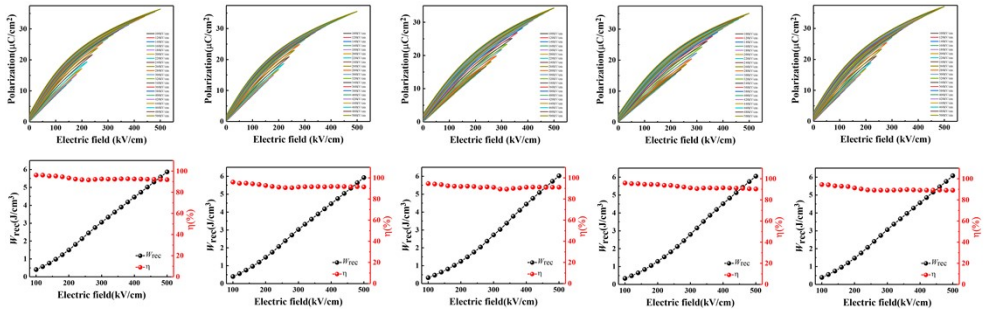

**Figure S21.** Five unipolar field-dependent  $P$ - $E$  loops of BKT-0.5CT ceramic.

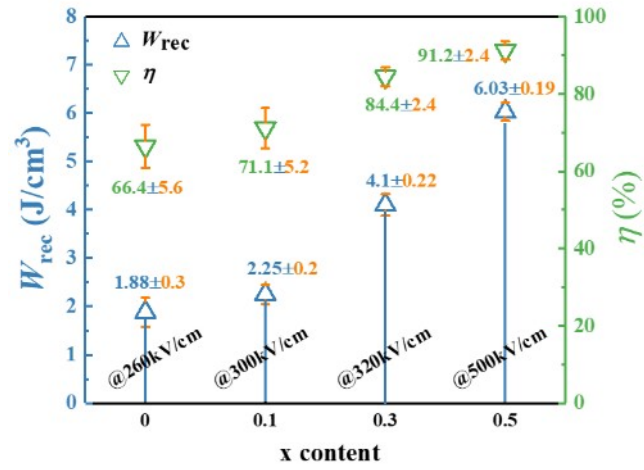

**Figure S22.** The change of  $W_{\text{rec}}$  and  $\eta$  near respective  $E_b$  for BKT-xCT ceramics.



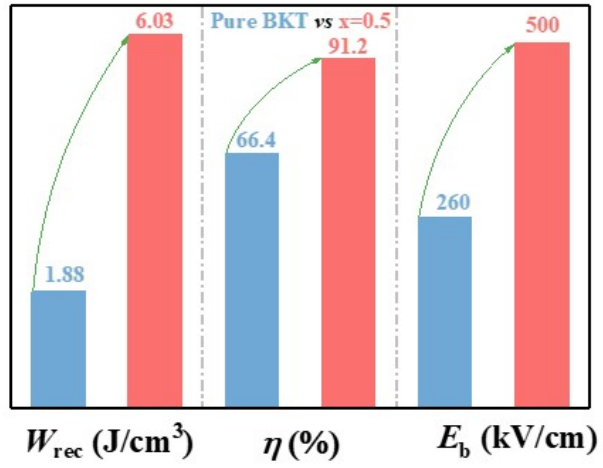

**Figure S23.** Comparison of energy storage performance in terms of  $W_{\text{rec}}$ ,  $\eta$ , and  $E_b$  for pure BKT and BKT-0.5CT ceramic.

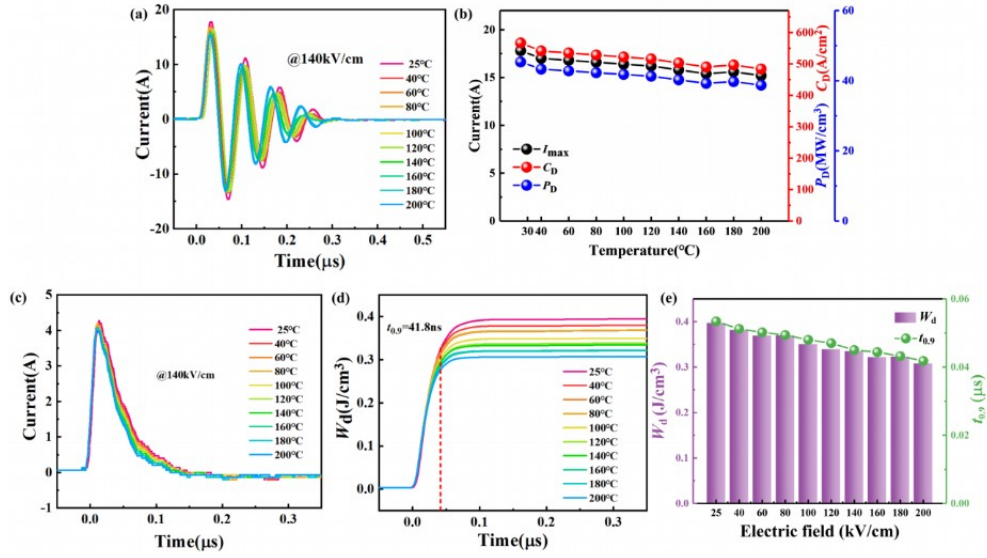

**Figure S24.** Temperature-dependent (a) underdamped discharge curves, (b) the change of  $I_{\max}$ ,  $C_D$ , and  $P_D$ , (c) overdamped discharge curves, (d)  $W_d$ - $t$  curves, and (e) the variation of  $W_d$  and  $t_{0.9}$  for BKT-0.5CT ceramic.

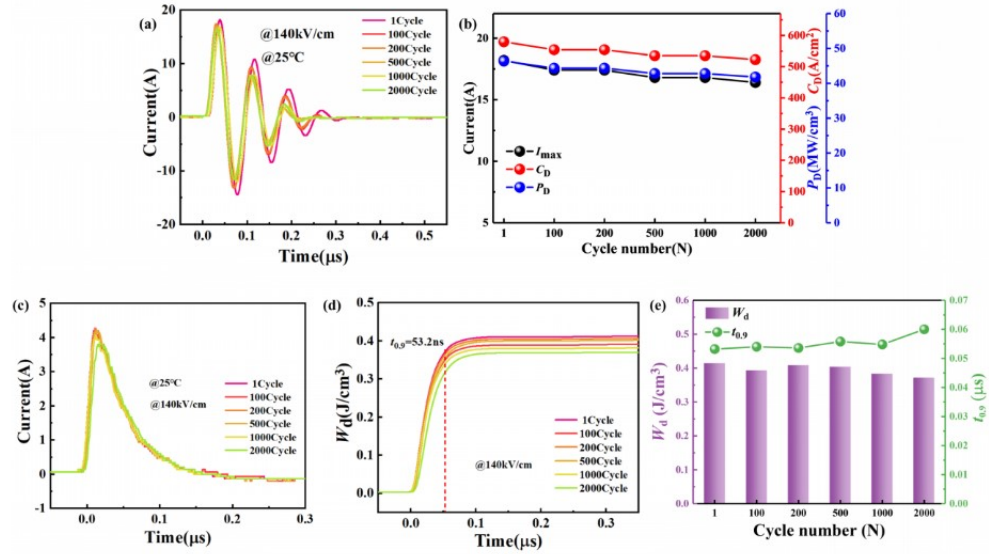

**Figure S25.** Cycles-dependent (a) underdamped discharge curves, (b) the change of  $I_{\text{max}}$ ,  $C_D$ , and  $P_D$ , (c) overdamped discharge curves, (d)  $W_d$ - $t$  curves, and (e) the variation of  $W_d$  and  $t_{0.9}$  for BKT-0.5CT ceramic.

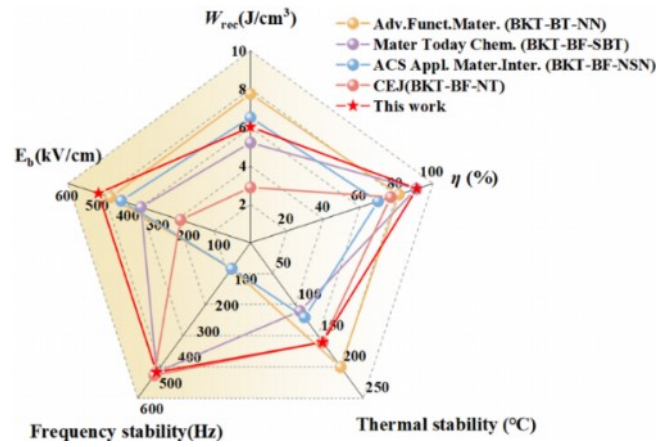

**Figure S26.** Comprehensive performance comparison of BKT-0.5CT and representative BKT-based energy storage ceramics in terms of  $W_{rec}$ ,  $\eta$ ,  $E_b$ , thermal stability, and frequency endurance.

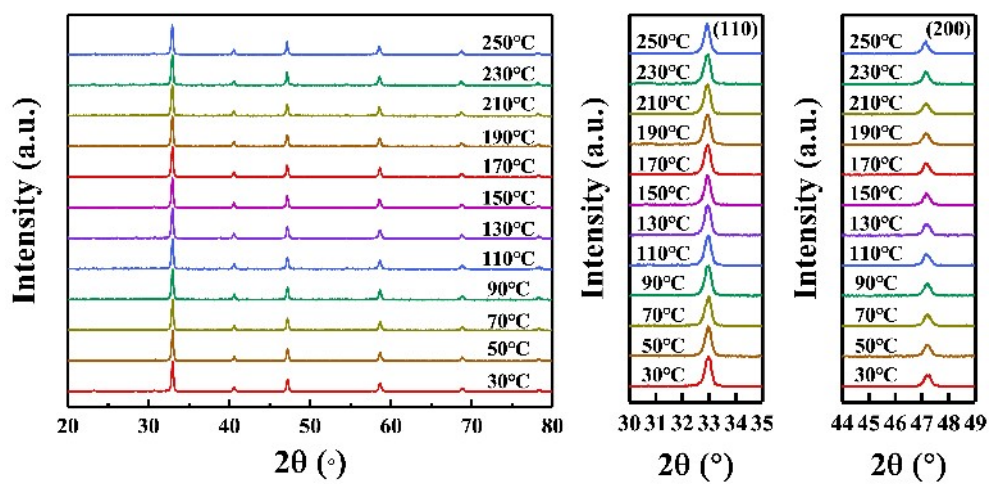

**Figure S27.** Temperature-dependent XRD patterns for BKT-0.5CT ceramic.

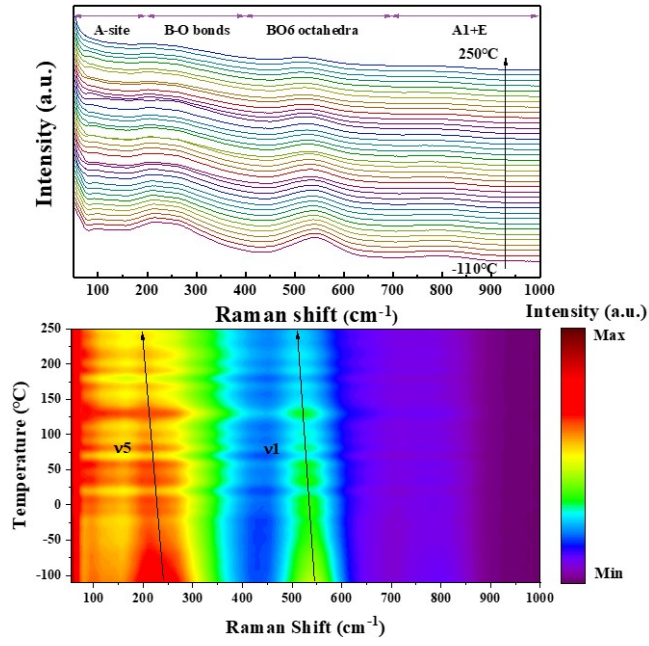

**Figure S28.** Raman spectra of the BKT-0.5CT ceramic measured from -110 °C to 250 °C.

**Table S1.** A summarization of BKT-0.5CT ceramic and recently reported BKT-based energy storage ceramics in terms of  $E_b$ ,  $W_{\text{rec}}$  and  $\eta$ .

| <b>Compositions</b> | <b><math>E_b</math> (kV/cm)</b> | <b><math>W_{\text{rec}}</math> (J/cm<sup>3</sup>)</b> | <b><math>\eta</math> (%)</b> | <b>Ref.</b>      |
|---------------------|---------------------------------|-------------------------------------------------------|------------------------------|------------------|
| BKT-MLT             | 180                             | 2.08                                                  | 68                           | 5                |
| BKT-BMN             | 230                             | 3.14                                                  | 83.7                         | 6                |
| BKT-ST              | 190                             | 2.31                                                  | 77.7                         | 7                |
| BKT-BF-NT           | 150                             | 2.88                                                  | 76.9                         | 8                |
| BKT-ST-BZT          | 260                             | 3.07                                                  | 88                           | 9                |
| BKT-BT-NN           | 460                             | 7.57                                                  | 81.4                         | 10               |
| BKT-BF-SBT          | 360                             | 5.21                                                  | 90.87                        | 11               |
| BKT-BF-SMN          | 410                             | 6.1                                                   | 72                           | 12               |
| BKT-BF-NSN          | 425                             | 6.52                                                  | 70                           | 13               |
| KNBNTF              | 425                             | 7.03                                                  | 86                           | 14               |
| <b>BKT-CT</b>       | <b>500</b>                      | <b>6.03</b>                                           | <b>91.2</b>                  | <b>This work</b> |

**Table S2.** Summarization of  $W_{\text{rec}}$ ,  $E_b$  and  $\eta$  with various admirable lead-free energy storage ceramics with  $\eta$  of  $\geq 90\%$ .

| <b>Compositions</b> | <b><math>E_b</math><br/>(kV/cm)</b> | <b><math>W_{\text{rec}}</math><br/>(J/cm<sup>3</sup>)</b> | <b><math>\eta</math><br/>(%)</b> | <b>Ref.</b> |
|---------------------|-------------------------------------|-----------------------------------------------------------|----------------------------------|-------------|
| BNT-BAT-CT          | 440                                 | 5.81                                                      | 97.8                             | 15          |
| BNT-SNA             | 520                                 | 6.64                                                      | 96.5                             | 16          |
| KNN-BZT             | 600                                 | 6.7                                                       | 92                               | 17          |
| BF-BT-BLH           | 520                                 | 6                                                         | 90                               | 18          |
| BF-BT-BSZ           | 185                                 | 3.06                                                      | 92                               | 19          |
| BF-BT-NN            | 360                                 | 8.12                                                      | 90                               | 20          |
| BNT-SBT-KNN         | 290                                 | 3.72                                                      | 90.7                             | 21          |
| BT-BMT              | 350                                 | 4.49                                                      | 93                               | 22          |
| BNT-BZN             | 240                                 | 3.22                                                      | 91.2                             | 23          |
| BNT-ST              | 535                                 | 5.63                                                      | 94                               | 24          |
| BNT-SLT             | 338                                 | 4.14                                                      | 92.2                             | 25          |
| NN-SBT              | 288                                 | 4.5                                                       | 90.3                             | 26          |
| NN-BMT              | 800                                 | 8                                                         | 90.4                             | 27          |
| CSTZ                | 440                                 | 3.37                                                      | 96                               | 28          |
| CST-Mg              | 460                                 | 2.88                                                      | 90                               | 29          |
| BKT-BF-CT           | 420                                 | 6.34                                                      | 93.32                            | 30          |
| BKT-BF-SBT          | 360                                 | 5.21                                                      | 90.87                            | 11          |
| BT-BZZ              | 250                                 | 2.47                                                      | 94.4                             | 31          |
| BT-SBT-BMZ          | 370                                 | 4.03                                                      | 96.2                             | 32          |
| BT-BLZ              | 285                                 | 3                                                         | 93.8                             | 33          |
| BT-BMN              | 520                                 | 4.55                                                      | 91                               | 34          |
| BF-SBT-SLT          | 260                                 | 2.55                                                      | 92                               | 35          |
| CST-SiO             | 360                                 | 2                                                         | 96                               | 36          |
| CT-BNT-BAT          | 700                                 | 6.39                                                      | 94.4                             | 37          |



|               |            |             |             |                                           |
|---------------|------------|-------------|-------------|-------------------------------------------|
| CT-Sm         | 547        | 2           | 93.7        | 38                                        |
| BT-BMS        | 240        | 2.25        | 94          | 39                                        |
| SBT           | 290        | 2.1         | 97.6        | 40                                        |
| SBT-BMH       | 360        | 3.1         | 93          | 41                                        |
| SBT-BNN       | 340        | 3.71        | 97          | 42                                        |
| BNT-SST       | 422        | 5.02        | 90          | 43                                        |
| BNT-BZN       | 180        | 2.86        | 90          | 23                                        |
| BNT-SBT-BMN   | 470        | 7.5         | 92          | 44                                        |
| BT-BMZ        | 230        | 1.61        | 94.3        | 45                                        |
| BT-BNT-SSN    | 206        | 2.02        | 90.18       | 46                                        |
| BT-KNT        | 300        | 2.03        | 94.5        | 47                                        |
| SBT-BZN       | 225        | 1.62        | 99.8        | 48                                        |
| <b>BKT-CT</b> | <b>500</b> | <b>6.03</b> | <b>91.2</b> | <input type="checkbox"/> <b>This work</b> |

---

**Table S3.** Comparison of temperature stability between BKT-0.5CT and other representative lead-free energy storage ceramics.

| <b>Compositions</b> | <b><math>E</math><br/>(kV/cm)</b> | <b><math>W_{\text{rec}}</math><br/>(J/cm<sup>3</sup>)</b> | <b><math>\eta</math><br/>(%)</b> | <b><math>T</math><br/>(°C)</b> | <b>Ref</b>           |
|---------------------|-----------------------------------|-----------------------------------------------------------|----------------------------------|--------------------------------|----------------------|
| BKT-BT-NN           | 300                               | 4.31                                                      | 86                               | 200                            | 10                   |
| ANT                 | 400                               | 4.3                                                       | 91                               | 150                            | 49                   |
| BNT-BT-CLT          | 280                               | 3.49                                                      | 92.5                             | 150                            | 50                   |
| SBT-BMZ             | 200                               | 1.6                                                       | 92                               | 150                            | 51                   |
| BBT12               | 300                               | 3.28                                                      | 85.57                            | 120                            | 52                   |
| KNN-H               | 400                               | 3.38                                                      | 85.8                             | 140                            | 53                   |
| BNT-SST             | 250                               | 2.5                                                       | 84                               | 180                            | 43                   |
| BNT-ST              | 300                               | 3                                                         | 92                               | 130                            | 24                   |
| KNN-BNZ             | 350                               | 2                                                         | 89                               | 160                            | 54                   |
| BT-BMZ              | 300                               | 2.85                                                      | 87                               | 150                            | 55                   |
| ALN                 | 320                               | 2.5                                                       | 90                               | 120                            | 56                   |
| BF-BT-SBT           | 250                               | 3.2                                                       | 75                               | 120                            | 57                   |
| KNN-BZNT            | 400                               | 3.1                                                       | 80                               | 180                            | 58                   |
| BF-ST               | 350                               | 3.8                                                       | 91                               | 120                            | 59                   |
| <b>BKT-CT</b>       | <b>350</b>                        | <b>3.45</b>                                               | <b>90.68</b>                     | <b>160</b>                     | <b>This<br/>work</b> |

**Table S4.** Comparison of frequency endurance between BKT-0.5CT and other representative lead-free energy storage ceramics.

| <b>Compositions</b> | <b><math>E</math><br/>(kV/cm)</b> | <b><math>W_{\text{rec}}</math><br/>(J/cm<sup>3</sup>)</b> | <b><math>\eta</math><br/>(%)</b> | <b><math>F</math><br/>(Hz)</b> | <b>Ref</b>           |
|---------------------|-----------------------------------|-----------------------------------------------------------|----------------------------------|--------------------------------|----------------------|
| BNT-BT-La           | 300                               | 3.3                                                       | 89                               | 500                            | 60                   |
| BKT-BT-NN           | 320                               | 5.2                                                       | 80                               | 100                            | 10                   |
| KNN-BZT             | 400                               | 3.8                                                       | 91.4                             | 100                            | 16                   |
| NKSN-SZ-BNZ         | 300                               | 3.3                                                       | 86                               | 100                            | 61                   |
| NN-CT               | 200                               | 1.3                                                       | 94                               | 100                            | 62                   |
| BNST-BMN            | 300                               | 3.25                                                      | 94                               | 200                            | 63                   |
| BNT-BAT-CT-BS       | 200                               | 1.7                                                       | 86                               | 200                            | 64                   |
| BNT-NN-SBS          | 300                               | 2.5                                                       | 83                               | 600                            | 65                   |
| BNT-BT-CTT          | 300                               | 3.6                                                       | 92                               | 200                            | 66                   |
| KNN-H               | 400                               | 4.7                                                       | 88                               | 300                            | 53                   |
| BF-ST               | 350                               | 3.8                                                       | 91                               | 100                            | 59                   |
| <b>BKT-CT</b>       | <b>350</b>                        | <b>3.49</b>                                               | <b>91.33</b>                     | <b>500</b>                     | <b>This<br/>work</b> |

## References

1. Z. Hu, B. Ma, R. E. Koritala and U. Balachandran, *Appl. Phys. Lett.*, 2014, **104**, 263902.
2. I. Fujii, S. Trolrier-McKinstry and C. Nies, *J. Am. Ceram. Soc.*, 2011, **94**, 194-9.
3. L. Wu, X. Wang, Z. Shen and L. Li, *J. Am. Ceram. Soc.*, 2017, **100**, 265-75.
4. H. Pan, J. Ma, J. Ma, Q. Zhang, X. Liu, B. Guan, L. Gu, X. Zhang, Y.-J. Zhang, L. Li, Y. Shen, Y.-H. Lin and C.-W. Nan, *Nat. Commun.*, 2018, **9**, 1813.
5. F. Li, T. Jiang, J. Zhai, B. Shen and H. Zeng, *J. Mater. Chem. C*, 2018, **6**, 7976-81.
6. F. Li, X. Hou, T. Li, R. Si, C. Wang and J. Zhai, *J. Mater. Chem. C*, 2019, **7**, 12127-38.
7. F. Li, R. Si, T. Li, C. Wang and J. Zhai, *Ceram. Int.*, 2020, **46**, 6995-8.
8. Q. Yang, M. Zhu, Q. Wei, M. Zhang, M. Zheng and Y. Hou, *Chem. Eng. J.*, 2021, **414**, 128769.
9. Y. Wei, N. Zhang, C. Jin, J. Shen, J. Xie, Z. Dai, L. Hu, Y. Zeng and Z. Jian, *Mater. Design*, 2021, **207**, 109887.
10. L. Chen, F. Long, H. Qi, H. Liu, S. Deng and J. Chen, *Adv. Funct. Mater.*, 2022, **32**, 2110478.
11. Z. Niu, P. Zheng, Y. Xiao, C. Luo, K. Zhang, J. Zhang, L. Zheng, Y. Zhang and W. Bai, *Mater. Chem.*, 2022, **24**, 100898.
12. X. Wang, Y. Fan, B. Zhang, A. Mostaed, L. Li, A. Feteira, D. Wang, D. C. Sinclair, G. Wang and Reaney, *J. Eur. Ceram. Soc.*, 2022, **42**, 7381-7.
13. H. Wang, E. Li, K. Wei, H. Li, M. Xing and C. Zhong, *ACS Appl. Mater. Inter.*, 2022, **14**, 54021-33.
14. Y. Li, Z. Chang, M. Zhang, M. Zhu, M. Zheng, Y. Hou, Q. Zhou, X. Chao, Z. Yang, H. Qi, J. Chen, Z. Liu, H. Huang, X. Ke and M. Sui, *Small*, 2024, **20**, 2401229.
15. C. Li, J. Liu, W. Bai, S. Wu, P. Zheng, J. Zhang, Z. Pan and J. Zhai, *J. Mater. Chem. A*, 2022, **10**, 9535-46.
16. F. Yan, X. Zhou, X. He, H. Bai, S. Wu, B. Shen and J. Zhai, *Nano Energy*, 2020,

- 75, 105012.
17. D. Li, D. Zhou, D. Wang, W. Zhao, Y. Guo and Z. Shi, *Adv. Funct. Mater.*, 2022, **32**, 2111776.
  18. J. Zhao, Z. Pan, L. Tang, Y. Shen, X. Chen, H. Li, P. Li, Y. Zhang, J. Liu and J. Zhai, *Mater. Today Phys.*, 2022, **27**, 100821.
  19. S. Ji, Q. Li, D. Wang, J. Zhu, M. Zeng, Z. Hou, Z. Fan, X. Gao, X. Lu, Q. Li and J.-M. Liu, *J. Am. Ceram. Soc.*, 2021, **104**, 2646-54.
  20. H. Qi, A. Xie, A. Tian and R. Zuo, *Adv. Energy Mater.*, 2020, **10**, 1903338.
  21. X. Zhang, D. Hu, Z. Pan, X. Lv, Z. He, F. Yang, P. Li, J. Liu and J. Zhai, *Chem. Eng. J.*, 2021, **406**, 126818.
  22. Q. Hu, Y. Tian, Q. Zhu, J. Bian, L. Jin, H. Du, D. O. Alikin, V. Y. Shur, Y. Feng, Z. Xu and X. Wei, *Nano Energy*, 2020, **67**, 104264.
  23. R. Kang, Z. Wang, W. Liu, L. He, X. Zhu, P. Shi, X. Zhang, L. Zhang and X. Lou, *ACS Appl. Mater. Inter.*, 2021, **13**, 25143-52.
  24. F. Yan, K. Huang, T. Jiang, X. Zhou, Y. Shi, G. Ge, B. Shen and J. Zhai, *Energy Storage Mater.*, 2020, **30**, 392-400.
  25. X. Qiao, F. Zhang, D. Wu, B. Chen, X. Zhao, Z. Peng, X. Ren, P. Liang, X. Chao and Z. Yang, *Chem. Eng. J.*, 2020, **388**, 124158.
  26. T. Wei, K. Liu, P. Fan, D. Lu, B. Ye, C. Zhou, H. Yang, H. Tan, D. Salamon, B. Nan and H. Zhang, *Ceram. Inter.*, 2021, **47**, 3713-9.
  27. H. Chen, J. Shi, X. Chen, C. Sun, F. Pang, X. Dong, H. Zhang and H. Zhou, *J. Mater. Chem. A*, 2021, **9**, 4789-99.
  28. Y. Pu, W. Wang, X. Guo, R. Shi, M. Yang and J. Li, *J. Mater. Chem. C*, 2019, **7**, 14384-93.
  29. T. Ouyang, Y. Pu, J. Ji, S. Zhou and R. Li, *Ceram. Inter.*, 2021, **47**, 20447-55.
  30. L. Zheng, Z. Niu, P. Zheng, K. Zhang, C. Luo, J. Zhang, N. Wang, W. Bai and Y. Zhang, *Mater. Today Energy*, 2022, **28**, 101078.
  31. Q. Wang, P.-M. Gong and C.-M. Wang, *Ceram. Inter.*, 2020, **46**, 22452-9.
  32. D. Hu, Z. Pan, X. Tan, F. Yang, J. Ding, X. Zhang, P. Li, J. Liu, J. Zhai and H. Pan, *Chem. Eng. J.*, 2021, **409**, 127375.

33. X. Li, X. Chen, J. Sun, M. Zhou and H. Zhou, *Ceram. Inter.*, 2020, **46**, 3426-32.
34. H. Yang, Z. Lu, L. Li, W. Bao, H. Ji, J. Li, A. Feteira, F. Xu, Y. Zhang, H. Sun, Z. Huang, W. Lou, K. Song, S. Sun, G. Wang and D. Wang, *ACS Appl. Mater. Inter.*, 2020, **12**, 43942-9.
35. J. Zhao, S. Bao, L. Tang, Y. Shen, Z. Su, F. Yang, J. Liu and Z. Pan, *J. Alloy. Compd.*, 2022, **898**, 162795.
36. W. Wang, Y. Pu, X. Guo, R. Shi, M. Yang and J. Li, *J. Alloy. Compd.*, 2020, **817**, 152695.
37. C. Li, J. Liu, L. Lin, W. Bai, S. Wu, P. Zheng, J. Zhang and J. Zhai, *Small*, 2023, **19**, 2206662.
38. J. Zhang, J. Wang, D. Gao, H. Liu, J. Xie and W. Hu, *J. Eur. Ceram. Soc.*, 2021, **41**, 352-9.
39. F. Si, B. Tang, Z. Fang, H. Li and S. Zhang, *J. Alloy. Compd.*, 2020, **819**, 153004.
40. P. Zhao, B. Tang, F. Si, C. Yang, H. Li and S. Zhang, *J. Eur. Ceram. Soc.*, 2020, **40**, 1938-46.
41. X. Kong, L. Yang, Z. Cheng and S. Zhang, *J. Am. Chem. Soc.*, 2020, **103**, 1722-31.
42. Y. Ding, P. Li, J. He, W. Que, W. Bai, P. Zheng, J. Zhang and J. Zhai, *Compos. Part B: Eng.*, 2022, **230**, 109493.
43. D. Li, D. Zhou, W. Liu, P. -J. Wang, Y. Guo, X. -G. Ya and H. -X. Lin, *Chem. Eng. J.*, 2021, **419**, 129601.
44. Ji. H, Wang. D, Bao. W, Lu. Z, Wang. G, Yang. H, Mostaed. A, Li. L, Feteira. A, Sun. S, Xu. F, Li. D, Ma. C.-J and Liu. S.-Y, *Energy Storage Mater.* 2021, **38**, 113-20.
45. C. Zhu, Z. Cai, L. Li and X. Wang, *J. Alloy. Compd.*, 2020, **816**, 152498.
46. Z. Dai, J. Xie, X. Fan, X. Ding, W. Liu, S. Zhou and X. Ren, *Chem. Eng. J.*, 2020, **397**, 125520.
47. Y. Huang, C. Zhao, B. Wu and J. Wu, *ACS Appl. Mater. Inter.*, 2020, **12**, 23885-95.
48. L. Zhang, L.-X. Pang, W.-B. Li and D. Zhou, *J. Eur. Ceram. Soc.*, 2020, **40**,

3343-7.

49. N. Luo, K. Han, M. J. Cabral, X. Liao, S. Zhang, C. Liao, G. Zhang, X. Chen, Q. Feng, J.-F. Li and Y. Wei, *Nat. Commun.*, 2020, **11**, 4824.
50. W. Cao, R. Lin, X. Hou, L. Li, F. Li, D. Bo, B. Ge, D. Song, J. Zhang, Z. Cheng and C. Wang, *Adv. Funct. Mater.*, 2023, **33**, 2301027.
51. X. Kong, L. Yang, Z. Cheng and S. Zhang, *Mater.*, 2020, **13**, 180.
52. Z. Sun, J. Zhang, H. Luo, Y. Yao, N. Wang, L. Chen, T. Li, C. H, H. Qi, S. Deng, L. C. Gallington, Y. Zhang, J. C. Neuefeind, H. Liu and J. Chen, *J. Am. Chem. Soc.*, 2023, **145**, 6194-202.
53. L. Chen, S. Deng, H. Liu, J. Wu, H. Qi and J. Chen, *Nat. Commun.*, 2022, **13**, 3089.
54. M. Zhang, H. Yang, Y. Lin, Q. Yuan and H. Du, *Energy Storage Mater.*, 2022, **45**, 861-8.
55. Q. Yuan, F.-Z. Yao, S.-D. Cheng, L. Wang, Y. Wang, S.-B. Mi, Q. Wang, X. Wang and H. Wang, *Adv. Funct. Mater.*, 2020, **30**, 2000191.
56. S. Li, T. Hu, H. Nie, Z. Fu, C. Xu, F. Xu, G. Wang and X. Dong, *Energy Storage Mater.*, 2021, **34**, 417-26.
57. G. Liu, M. Tang, X. Hou, B. Guo, J. Lv, J. Dong, Y. Wang, Q. Li, K. Yu, Y. Yan and L. Jin, *Chem. Eng. J.*, 2021, **412**, 127555.
58. M. Zhang, H. Yang, Y. Yu and Y. Lin, *Chem. Eng. J.*, 2021, **425**, 131465.
59. F. Yan, H. Bai, G. Ge, J. Lin, C. Shi, K. Zhu, B. Shen, J. Zhai and S. Zhang, *Small*, 2022, **18**, 2106515.
60. B. Chu, J. Hao, P. Li, Y. Li, W. Li, L. Zheng and H. Zeng, *ACS Appl. Mater. Inter.*, 2022, **14**, 19683-96.
61. A. Xie, J. Fu, R. Zuo, X. Jiang, T. Li, Z. Fu, Y. Yin, X. Li and S. Zhang, *Adv. Mater.*, 2022, **34**, 2204356.
62. A. Xie, J. Fu, R. Zuo, C. Zhou, Z. Qiao, T. Li and S. Zhang, *Chem. Eng. J.*, 2022, **429**, 132534.
63. X. Li, Y. Cheng, F. Wang, Q. Xu, Y. Chen, L. Xie, Z. Tan, J. Xing and J. Zhu, *Chem. Eng. J.*, 2022, **431**, 133441.

64. Y. Ding, W. Que, J. He, W. Bai, P. Zheng, P. Li, J. Zhang and J. Zhai, *J. Eur. Ceram. Soc.*, 2022, **42**, 29-139.
65. C. Zhang, W. Xiao, F. Zeng, D. Su, K. Du, S. Qiu, G. Fan, W. Lei, H. Zhang, S. Jiang, J.-M. Wu and G. Zhang, *J. Mater. Chem. A*, 2021, **9**, 10088-94.
66. T. Li, X. Jiang, J. Li, A. Xie, J. Fu and R. Zuo, *ACS Appl. Mater. Inter.*, 2022, **14**, 22263-9.
